# Supplementary material for: Target-specific membrane potential dynamics of neocortical projection neurons during goal-directed behavior
Source: eLife. 2016 Jun 21;5:e15798. doi: 10.7554/eLife.15798 (PMC4915810; doi:10.7554/eLife.15798)
Supplement: Figure 1—source data 1. — DOI: http://dx.doi.org/10.7554/eLife.15798.004 [file elife-15798-fig1-data1.xlsx]

## Sheet: Figure 1
Figure 1-source data 1. Data values and statistics underlying Figure 1.
(C)														(D)																(E)
Good Performer							Naive							M1-p neurons								S2-p neurons								M1-p neurons								S2-p neurons
Mouse #	Cell #	Projection	Hit Rate	FA rate	d'		Mouse_#	Cell #	Projection	Hit Rate	FA rate	d'		Cell #	PSP amp (mV)	Late DVm (mV)	Lick DVm (mV)	Early DAP (Hz)	Late DAP (Hz)	Lick DAP (Hz)		Cell #	PSP amp (mV)	Late DVm (mV)	Lick DVm (mV)	Early DAP (Hz)	Late DAP (Hz)	Lick DAP (Hz)		Cell #	PSP amp (mV)	Late DVm (mV)	Lick DVm (mV)	Early DAP (Hz)	Late DAP (Hz)	Lick DAP (Hz)		Cell #	PSP amp (mV)	Late DVm (mV)	Lick DVm (mV)	Early DAP (Hz)	Late DAP (Hz)	Lick DAP (Hz)
1	1	M1-p	0.98	0.150943	3.08614		1	1	M1-p	0.228571	0.0909091	0.591618		1	14.373	2.51034	-2.17346	9.60584	0.21808	-0.162872		1	9.62579	4.68114	1.43307	0	0	0		1	6.42042	-1.06521	1.60121	-0.0113636	-0.0113636	-0.0113636		1	13.3755	3.92473	2.52914	-0.181818	-0.181818	-0.181818
2	2	M1-p	0.830986	0.35	1.34339		2	2	M1-p	0.206897	0.314286	-0.333498		2	6.72439	2.40301	0.4753	-0.131868	0.376607	-0.109269		2	15.0468	8.09657	3.93507	0.540541	0	0		2	8.4497	1.42597	1.31096	-0.0258621	-0.0258621	-0.0258621		2	7.99352	0.810468	5.14479	1.5687	4.0687	0.402035
2	3	M1-p	0.890625	0.348837	1.61832		3	3	M1-p	0.565217	0.333333	0.594938		3	6.94842	0.23211	-0.319037	-0.0572917	-0.0572917	-0.0572917		3	12.3291	5.07019	1.07323	0.206143	-0.116438	-0.0519219		3	11.9292	0.337274	-1.78207	4.39272	-0.0517241	0.096424		3	9.97988	1.31738	0.456099	-0.030303	-0.030303	-0.030303
2	4	M1-p	0.207792	0.0178571	1.78153		3	4	M1-p	0.24	0.166667	0.261119		4	9.29886	1.49388	-0.770719	0	0	0		4	20.6544	13.2698	11.2416	40.8358	11.7882	4.89934		4	7.62276	2.72271	1.28713	-0.0125	-0.0125	-0.0125		4	8.51632	0.731448	-0.926235	-0.0744681	-0.0744681	-0.0744681
3	5	M1-p	0.964286	0.208333	2.61496		3	5	M1-p	0.0263158	0.0833333	-0.554937		5	5.05883	1.65343	1.00013	-0.0869565	-0.0869565	-0.0869565		5	8.15135	3.38396	3.7914	0.591543	0.199386	0.173242		5	15.0937	10.3722	2.29358	10.4632	10.4632	0.110294		5	6.63974	1.96491	-1.35838	-0.00961538	-0.00961538	-0.00961538
3	6	M1-p	0.357143	0.0222222	1.64377		4	6	M1-p	0.515152	0.464286	0.127631		6	2.82771	0.19936	-0.633861	0	0	0		6	3.61854	-0.726224	-0.666879	0	0	0		6	11.6938	4.74729	2.76728	-0.873418	-0.873418	0.459915		6	7.40824	2.58524	-0.937996	-0.0294118	-0.0294118	-0.0294118
4	7	M1-p	0.514286	0.142857	1.10339		4	7	M1-p	0.254545	0.275862	-0.0650754		7	8.37778	1.5112	1.42507	-0.0357143	-0.0357143	-0.0357143		7	4.93347	2.73119	4.36135	-0.00649351	-0.00649351	0.183983		7	16.9244	6.83955	5.55357	-0.0111111	-0.0111111	-0.0111111		7	8.31835	1.29237	-1.46752	0.593814	-0.206186	-0.206186
4	8	M1-p	0.764706	0.125	1.87187		4	8	M1-p	0.6	0.272727	0.857932		8	8.7676	-3.11632	-1.09483	0	0	0		8	8.56605	3.1236	2.03819	-0.1125	-0.1125	-0.1125		8	10.1798	5.2423	2.76939	0	0	0		8	2.90903	0.797245	0.149354	-0.084507	-0.084507	-0.084507
5	9	M1-p	0.9375	0.388889	1.53412		4	9	M1-p	0.277778	0.175	0.345133		9	7.42873	4.60127	3.61431	-0.0833333	-0.0833333	0.151961		9	9.68235	0.326447	-1.0136	2.55526	-0.301887	-0.149506		9	15.9038	5.61451	5.69605	5.08916	-0.365385	0.725524		9	8.66989	2.96805	2.43072	0	0	0
5	10	M1-p	0.585366	0.0192308	2.28554		5	10	M1-p	0.2	0.166667	0.1258		10	10.6344	3.37785	2.39112	1.45377	0.771957	-0.182589		10	13.5472	8.70781	7.7287	1.55714	-0.0428571	0.0104762		10	7.13871	-0.336316	1.83332	0.453125	-0.171875	0.675348		10	7.54774	1.93459	1.23735	-0.00505051	-0.00505051	-0.00505051
6	11	M1-p	0.925926	0.25	2.12059		5	11	M1-p	0.323529	0.347826	-0.0666557		11	4.93086	0.866359	2.1677	-0.121212	0.295455	-0.121212		11	8.32443	3.92396	3.8672	-0.217742	0.0203532	0.956861		11	15.8478	-2.52373	1.83396	8.38889	-0.5	-0.0555556		11	7.19462	2.04554	3.63066	-0.137931	0.0704023	3.52874
6	12	M1-p	0.842105	0.25	1.67764		5	12	M1-p	0.342857	0.323529	0.053174		12	15.7688	1.99006	1.87175	31.1	0.475	-0.15		12	14.8983	7.27732	6.4283	-0.222222	0.373016	0.0952383		12	19.2272	4.15318	1.14431	21.6651	0.301484	-0.153061		12	8.21857	0.296405	-2.57339	2.19167	0.191667	-0.208333
7	13	M1-p	0.708333	0.142857	1.61609		5	13	M1-p	0.333333	0.166667	0.536694		13	6.81717	3.00863	2.03591	1.28077	0.511538	-3.33462		13	10.7501	1.72946	2.06525	-0.05	-0.05	-0.05										13	7.8842	0.82431	-2.49579	-0.220339	-0.220339	-0.220339
8	14	M1-p	0.969697	0.380952	2.17934		5	14	M1-p	0.357143	0.571429	-0.546119		14	8.41052	2.17505	1.53517	-0.0465116	-0.0465116	-0.0465116		14	4.37651	5.4455	2.56385	-1.02083	4.76864	0.97917		Summary for M1-p								14	13.0561	1.39124	0.415282	4.00988	0.609877	-0.310123
8	15	M1-p	0.97561	0.325581	2.42265		6	15	M1-p	0.28125	0.166667	0.388289		15	9.53198	0.820339	0.129755	-0.0208333	-0.0208333	-0.0208333		15	6.81894	0.848	-1.01313	-0.0769231	-0.0769231	-0.0769231		Mean	12.2026	3.12748	2.19239	4.1265	0.728457	0.149838
8	16	M1-p	0.25	0.0227273	1.32593		7	16	M1-p	0.314286	0.1875	0.403408		16	7.27454	7.14296	2.1997	1.89655	6.58405	0.479885		16	9.24462	4.08502	4.05202	-0.00675676	-0.00675676	0.352218		SEM	1.24787	1.07646	0.573036	1.92877	0.889254	0.085884		Summary for S2-p
9	17	M1-p	0.986111	0.357143	2.56652		7	17	M1-p	0.0285714	0.160714	-0.91069		17	11.8901	1.35939	0.724008	0	0	0		17	12.189	4.94295	2.7605	0	0	0		Median	11.8115	3.43795	1.83364	0.226563	-0.019181	-0.00555555		Mean	8.40798	1.63457	0.445292	0.542187	0.292782	0.183615
9	18	M1-p	0.962963	0.185185	2.68194		8	18	S2-p	0.18	0.175439	0.0175241		18	17.2347	1.87399	0.679602	16.3273	-0.4	-0.181818		18	9.04069	8.91425	6.0024	0.333499	2.59765	1.31463										SEM	0.687004	0.26946	0.618849	0.328965	0.295633	0.26123
9	19	M1-p	0.5	0.0104167	2.31099		8	19	S2-p	0.0963855	0.114754	-0.100798		19	20.3456	3.35427	0.805534	24	0	0		19	8.86638	-0.920148	1.11618	0	0	0										Median	8.10604	1.35431	0.282318	-0.0195136	-0.0195136	-0.0523855
10	20	M1-p	0.96	0.117647	2.93752		8	20	S2-p	0.0666667	0.25	-0.826596		20	8.30828	1.0317	1.25228	0	0	0		20	7.27995	-1.09871	0.785557	0.187341	-0.98913	-0.793052
10	21	M1-p	0.990909	0.0909091	3.69707		9	21	S2-p	0.433333	0.346939	0.225704		21	13.6919	-0.256467	-0.216806	7.0035	-0.269231	-0.269231		21	9.00274	0.780022	0.1327	0.33629	-0.151515	-0.151515
10	22	M1-p	0.576923	0.125	1.34438		9	22	S2-p	0.21875	0.235294	-0.0548995		22	9.00636	-1.20659	-1.14527	-0.0769231	-0.0769231	-0.0769231		22	6.9481	2.465	1.50868	-0.047619	-0.047619	0.154401		Statistical P values
10	23	M1-p	0.941176	0.166667	2.53215		10	23	S2-p	0.382353	0.409091	-0.0694228										23	10.1811	2.75378	1.70105	-0.328358	0.782752	-0.0320619		M1-p vs S2-p (PSP amp)			0.043	Two-tailed Wilcoxon rank sum test
10	24	M1-p	0.933333	0.333333	1.93181		10	24	S2-p	0.65	0.470588	0.459112		Summary for M1-p								24	20.1942	4.36952	2.14321	8.57143	0	0		M1-p vs S2-p (Late DVm)			0.285	Two-tailed Wilcoxon rank sum test
10	25	M1-p	0.238095	0.0277778	1.20206		11	25	S2-p	0.390625	0.409091	-0.0478063		Mean	9.71139	1.68299	0.725153	4.18214	0.370722	-0.19109		25	17.3181	7.18192	7.12254	0.460262	-0.00485437	0.0261534		M1-p vs S2-p (Lick DVm)			0.043	Two-tailed Wilcoxon rank sum test
11	26	S2-p	0.960526	0.245283	2.44624		12	26	S2-p	0.295455	0.192308	0.331905		SEM	0.912336	0.438374	0.30011	1.84563	0.301318	0.152929		26	8.99934	3.21771	3.73241	-0.05	-0.05	-0.05		M1-p vs S2-p (Early DAP)			0.087	Two-tailed Wilcoxon rank sum test
11	27	S2-p	0.578125	0.0666667	1.69819		12	27	S2-p	0.03125	0.25	-1.18824		Median	8.58906	1.58231	0.764771	0	0	-0.0519017		27	5.15806	3.21261	2.87678	-0.391304	0.719806	0.349437		M1-p vs S2-p (Late DAP)			0.54	Two-tailed Wilcoxon rank sum test
12	28	S2-p	0.767442	0.293333	1.27412		13	28	S2-p	0.9	0.875	0.131202										28	17.7036	7.37002	5.32985	0.940186	0.2259	0.368757		M1-p vs S2-p (Lick DAP)			0.046	Two-tailed Wilcoxon rank sum test
13	29	S2-p	0.979167	0.3125	2.52561		13	29	S2-p	0.191489	0.121212	0.296528										29	13.7313	0.0646648	0.0905383	11.699	-1.24219	-1.0069
13	30	S2-p	0.990196	0.170732	3.28505		13	30	S2-p	0.173913	0.0645161	0.579115										30	15.7083	5.37162	6.64645	4.52222	4.38333	2.52222
13	31	S2-p	0.47619	0.0119048	2.64551		14	31	S2-p	0.0555556	0	0.733129										31	5.24576	3.40779	2.39418	-1.30886	0.447895	-0.516068
14	32	S2-p	0.9	0.2	2.12317		14	32	S2-p	0.0333333	0.2	-1.83391		Statistical P values
14	33	S2-p	0.988095	0.22	3.03238		14	33	S2-p	0.461538	0.45	0.0291027		M1-p vs S2-p (PSP amp)			0.397	Two-tailed Wilcoxon rank sum test
14	34	S2-p	0.358209	0.0192308	1.70665		14	34	S2-p	0.510204	0.314815	0.507829		M1-p vs S2-p (Late DVm)			0.0035	Two-tailed Wilcoxon rank sum test				Summary for S2-p
15	35	S2-p	0.977273	0.0833333	3.38342		15	35	S2-p	0.407407	0.5	-0.234219		M1-p vs S2-p (Lick DVm)			0.00038	Two-tailed Wilcoxon rank sum test				Mean	10.585	4.00022	3.10415	2.24184	0.745413	0.303086
15	36	S2-p	0.98	0.333333	2.48448		16	36	S2-p	0.530612	0.46875	0.155221		M1-p vs S2-p (Early DAP)			0.573	Two-tailed Wilcoxon rank sum test				SEM	0.818656	0.589421	0.503991	1.37438	0.433388	0.190024
16	37	S2-p	0.934783	0.32	1.98009									M1-p vs S2-p (Late DAP)			0.979	Two-tailed Wilcoxon rank sum test				Median	9.24462	3.40779	2.56385	0	0	0
17	38	S2-p	0.803922	0.0967742	2.15587		Summary for Naive							M1-p vs S2-p (Lick DAP)			0.0154	Two-tailed Wilcoxon rank sum test
17	39	S2-p	0.477273	0.0416667	1.67466		Mean			0.308453	0.280978	0.0255343
18	40	S2-p	0.986111	0.2	3.04203		SEM			0.0331883	0.0286957	0.0932754
18	41	S2-p	0.433333	0.1	1.11366		Median			0.288352	0.25	0.126716
19	42	S2-p	0.9375	0.222222	2.29883
19	43	S2-p	0.923077	0.0833333	2.80907
19	44	S2-p	0.54	0.0967742	1.40059
20	45	S2-p	0.603175	0.0555556	1.85479
21	46	S2-p	0.991071	0.103448	3.63071
21	47	S2-p	0.989796	0.0625	3.85288
21	48	S2-p	0.972222	0.0555556	3.50772
22	49	S2-p	0.671875	0.139535	1.52751
23	50	S2-p	0.829268	0.189189	1.83217
23	51	S2-p	0.642857	0.0666667	1.86719
23	52	S2-p	0.518519	0.0909091	1.38161
24	53	S2-p	0.737705	0.183673	1.53774
24	54	S2-p	0.875	0.307692	1.65275
24	55	S2-p	0.642857	0.181818	1.27456
25	56	S2-p	0.913043	0.388889	1.64195
26	57	S2-p	0.772727	0.261905	1.38534
26	58	S2-p	0.837209	0.134615	2.08789
27	59	S2-p	0.698113	0.210526	1.32358
Summary for Good performer
Mean			0.770856	0.171355	2.1164
SEM			0.0295397	0.014794	0.0936437
Median			0.842105	0.150943	1.93181
		Statistical P values
		HR vs FAR (Good performer)				< 0.0001	Two-tailed Wilcoxon singed rank test
		HR vs FAR (Naive)				0.1763	Two-tailed Wilcoxon singed rank test
		Good performer vs Naive (d')				< 0.0001	Two-tailed Wilcoxon rank sum test
