# Supplementary material for: Target-specific membrane potential dynamics of neocortical projection neurons during goal-directed behavior
Source: eLife. 2016 Jun 21;5:e15798. doi: 10.7554/eLife.15798 (PMC4915810; doi:10.7554/eLife.15798)
Supplement: Figure 1—source data 2. — DOI: http://dx.doi.org/10.7554/eLife.15798.005 [file elife-15798-fig1-data2.xlsx]

## Sheet: Figure 1-figure supplement3
Figure 1-source data 2. Data values and statistics underlying Figure 1-figure supplement 3.
(B)				(D)				(E)						(F)								(G)
	Good performer				Naive			M1-p neurons						M1-p neurons								M1-p neurons
Cell #	M1-p	S2-p		Cell #	M1-p	S2-p
1	20.2181	0		1	-0.0113636	-0.181818		Cell #	DVm at 0.05 - 0.35 s (mV)	DVm at 0.35 - 1.0 s (mV)	DAP at 0.05 - 0.35 s (Hz)	DAP at 0.35 - 1.0 s (Hz)		Mouse #	PSP amp (mV)	Late DVm (mV)	Lick DVm (mV)	Early DAP (Hz)	Late DAP (Hz)	Lick DAP (Hz)		Mouse #	PSP amp (mV)	Late DVm (mV)	Lick DVm (mV)	Early DAP (Hz)	Late DAP (Hz)	Lick DAP (Hz)
2	-0.131868	0		2	-0.0258621	-0.931298		1	0.0101415	1.51523	-0.0113636	-0.0113636		1	14.373	2.51034	-2.17346	9.60584	0.21808	-0.162872		1	6.42042	-1.06521	1.60121	-0.0113636	-0.0113636	-0.0113636
3	-0.0572917	0.690012		3	11.0594	-0.030303		2	1.61402	1.20632	-0.0258621	-0.0258621		2	7.65722	1.37633	-0.204819	-0.0630532	0.106438	-0.0555203		2	8.4497	1.42597	1.31096	-0.0258621	-0.0258621	-0.0258621
4	0	30.3597		4	-0.0125	-0.0744681		3	0.157282	-2.02512	-0.0517241	0.119216		3	3.94327	0.926395	0.183134	-0.0434783	-0.0434783	-0.0434783		3	9.77598	1.52999	-0.24747	2.19011	-0.0321121	0.041962
5	-0.0869565	1.76801		5	2.81617	-0.00961538		4	2.3418	1.24227	-0.0125	-0.0125		4	8.57269	-0.80256	0.16512	-0.0178571	-0.0178571	-0.0178571		4	13.4729	6.80033	3.34595	2.39468	2.39468	0.139775
6	0	0		6	-0.873418	-0.0294118		5	8.40323	1.95946	6.93382	0.146493		5	9.03157	3.98956	3.00272	0.685221	0.344312	-0.015314		5	12.9634	0.918155	3.12111	4.64372	-0.345753	0.448439
7	-0.0357143	-0.00649351		7	-0.0111111	1.79381		6	3.98802	2.81333	-0.873418	0.665044		6	10.3498	1.42821	2.01973	15.4894	0.385227	-0.135606		6	19.2272	4.15318	1.14431	21.6651	0.301484	-0.153061
8	0	-0.1125		8	0	-0.084507		7	4.61861	2.67683	-0.0111111	-0.0111111		7	6.81717	3.00863	2.03591	1.28077	0.511538	-3.33462
9	-0.0833333	6.84096		9	13.271	0		8	6.05876	5.50371	0	0		8	8.40568	3.37945	1.28821	0.609736	2.17224	0.137513		Summary for M1-p
10	1.90832	3.95714		10	1.70313	-0.00505051		9	-0.951538	1.7787	0.240676	0.613636		9	13.4128	1.02605	0.349891	7.87564	-0.124359	-0.0879954		Mean	11.7183	2.29374	1.71268	5.14273	0.380178	0.0733148
11	-0.121212	-0.217742		11	21.7222	-0.137931		10	7.04153	5.26235	0.314236	0.58133										SEM	1.85775	1.12957	0.547427	3.38027	0.411482	0.0845321
12	59.225	-0.222222		12	40.756	-0.208333		11	0.360313	1.84564	-0.12963	-0.15812		Summary for M1-p								Median	11.3697	1.47798	1.45608	2.29239	-0.0186129	0.0152992
13	-0.2577	-0.05		13		-0.220339		12	2.85026	1.28294	0.149969	-0.153061		Mean	9.17369	1.87138	0.740714	3.9358	0.394682	-0.412861
14	-0.0465116	-1.02083		14		11.2099		Mean	3.04104	2.08847	0.543591	0.146142		SEM	1.07088	0.495277	0.512499	1.89037	0.233388	0.366338		S2-p neurons
15	-0.0208333	-0.0769231		Mean	7.5328	0.792187		SEM	0.872302	0.565243	0.587074	0.0864129		Median	8.57269	1.42821	0.349891	0.685221	0.21808	-0.0555203
16	-0.603448	-0.00675676		SEM	3.65357	0.815776		Median	2.59603	1.81217	-0.0112374	-0.00555555										Mouse #	PSP amp (mV)	Late DVm (mV)	Lick DVm (mV)	Early DAP (Hz)	Late DAP (Hz)	Lick DAP (Hz)
17	0	0		Median	0.851565	-0.0523855								S2-p neurons								1	10.6845	2.3676	3.83697	0.693442	1.94344	0.110109
18	30.5091	-0.0438596						S2-p neurons														2	9.2481	1.02441	-0.235068	-0.0523855	-0.0523855	-0.0523855
19	50	0		P value	0.02									Mouse #	PSP amp (mV)	Late DVm (mV)	Lick DVm (mV)	Early DAP (Hz)	Late DAP (Hz)	Lick DAP (Hz)		3	7.02399	2.27508	-1.14819	-0.0195136	-0.0195136	-0.0195136
20	0	1.95205		Two-tailed Wilcoxion rank sumtest				Cell #	DVm at 0.05 - 0.35 s (mV)	DVm at 0.35 - 1.0 s (mV)	DAP at 0.05 - 0.35 s (Hz)	DAP at 0.35 - 1.0 s (Hz)		1	12.3363	6.38885	2.68407	0.27027	0	0		4	8.31835	1.29237	-1.46752	0.593814	-0.206186	-0.206186
21	-0.269231	1.068						1	2.61333	2.50745	-0.181818	-0.181818		2	12.3291	5.07019	1.07323	0.206143	-0.116438	-0.0519219		5	2.90903	0.797245	0.149354	-0.084507	-0.084507	-0.084507
22	-0.0769231	-0.047619						2	4.22876	5.19202	2.8187	0.414856		3	10.8081	5.30918	4.78871	13.8091	3.99587	1.69086		6	8.10881	2.45132	1.83404	-0.00252526	-0.00252526	-0.00252526
23		-0.328358						3	0.663927	0.469008	-0.030303	-0.030303		4	6.74976	2.92739	3.19977	-0.0594968	-0.0594968	0.0357413		7	7.7066	1.17097	0.528635	1.02687	0.131035	1.6602
24		17.8572						4	0.754708	-1.0117	-0.0744681	-0.0744681		5	11.6148	4.51713	3.35755	2.0562	-0.172372	-0.0695149		8	7.8842	0.82431	-2.49579	-0.220339	-0.220339	-0.220339
25		-0.00485437						5	0.672557	-1.65267	-0.00961538	-0.00961538		6	8.32443	3.92396	3.8672	-0.217742	0.0203532	0.956861		9	13.0561	1.39124	0.415282	4.00988	0.609877	-0.310123
26		-0.05						6	1.57252	-1.20337	-0.0294118	-0.0294118		7	12.8242	4.50339	4.24677	-0.136111	0.161508	0.0226192
27		-0.391304						7	0.932471	-1.72599	-0.206186	-0.206186		8	5.59772	3.14675	0.77536	-0.548877	2.34586	0.451123		Summary for S2-p
28		-0.0121951						8	0.736355	0.0777704	-0.084507	-0.084507		9	9.24462	4.08502	4.05202	-0.00675676	-0.00675676	0.352218		Mean	8.32663	1.51051	0.157523	0.660526	0.233211	0.0971923
29		31.1108						9	2.82187	2.41568	0	0		10	12.189	4.94295	2.7605	0	0	0		SEM	0.9163	0.223523	0.624645	0.442518	0.229066	0.200031
30		9.24442						10	1.81668	1.18465	-0.00505051	-0.00505051		11	8.39567	2.29846	2.63471	0.173613	0.536173	0.17386		Median	8.10881	1.29237	0.149354	-0.00252526	-0.0195136	-0.0523855
31		-1.8494						11	2.69688	3.57389	1.9454	3.1954		12	9.00274	0.780022	0.1327	0.33629	-0.151515	-0.151515
Mean	9.34421	2.7364						12	-0.649661	-2.57816	0.0583337	-0.208333		13	12.4411	3.1961	1.78431	2.73182	0.245044	0.0407797		Statistical P values
SEM	3.6594	1.48272						13	0.109217	-2.6764	-0.220339	-0.220339		14	10.4918	4.53741	4.57724	0.00631921	0.221651	0.10853		M1-p vs S2-p (PSP amp)			0.14	Two-tailed Wilcoxon rank sum test
Median	-0.0282738	-0.00485437						14	1.47159	0.228008	0.94321	-0.605508		15	17.7036	7.37002	5.32985	0.940186	0.2259	0.368757		M1-p vs S2-p (Late DVm)			0.61	Two-tailed Wilcoxon rank sum test
								Mean	1.46009	0.34287	0.351711	0.139623		16	14.7198	2.71814	3.36849	8.11062	1.57057	0.757663		M1-p vs S2-p (Lick DVm)			0.14	Two-tailed Wilcoxon rank sum test
P value	0.76							SEM	0.342496	0.63713	0.246175	0.241999		17	5.24576	3.40779	2.39418	-1.30886	0.447895	-0.516068		M1-p vs S2-p (Early DAP)			0.11	Two-tailed Wilcoxon rank sum test
Two-tailed Wilcoxion rank sum test								Median	1.20203	0.152889	-0.0195136	-0.0523855										M1-p vs S2-p (Late DAP)			0.86	Two-tailed Wilcoxon rank sum test
														Summary for S2-p								M1-p vs S2-p (Lick DAP)			0.27	Two-tailed Wilcoxon rank sum test
								Statistical P values						Mean	10.5893	4.06605	3.00157	1.55075	0.544956	0.245294
								M1-p vs S2-p (DVm at 0.05 - 0.35 s)		0.27	Two-tailed Wilcoxon rank sum test			SEM	0.786662	0.380319	0.352775	0.920577	0.268662	0.123246
								M1-p vs S2-p (DVm at 0.35 - 1.0 s)		0.041	Two-tailed Wilcoxon rank sum test			Median	10.8081	4.08502	3.19977	0.173613	0.161508	0.0407797
								M1-p vs S2-p (DAP at 0.05 - 0.35 s)		0.68	Two-tailed Wilcoxon rank sum test
								M1-p vs S2-p (DAP at 0.35 - 1.0 s)		0.061	Two-tailed Wilcoxon rank sum test
														Statistical P values
														M1-p vs S2-p (PSP amp)			0.37	Two-tailed Wilcoxon rank sum test
														M1-p vs S2-p (Late DVm)			0.0035	Two-tailed Wilcoxon rank sum test
														M1-p vs S2-p (Lick DVm)			0.0023	Two-tailed Wilcoxon rank sum test
														M1-p vs S2-p (Early DAP)			0.24	Two-tailed Wilcoxon rank sum test
														M1-p vs S2-p (Late DAP)			0.91	Two-tailed Wilcoxon rank sum test
														M1-p vs S2-p (Lick DAP)			0.011	Two-tailed Wilcoxon rank sum test
