# Supplementary material for: Target-specific membrane potential dynamics of neocortical projection neurons during goal-directed behavior
Source: eLife. 2016 Jun 21;5:e15798. doi: 10.7554/eLife.15798 (PMC4915810; doi:10.7554/eLife.15798)
Supplement: Figure 1—source data 3. — DOI: http://dx.doi.org/10.7554/eLife.15798.006 [file elife-15798-fig1-data3.xlsx]

## Sheet: Figure 1-figure supplement 4
Figure 1-source data 3. Data values and statistics underlying Figure 1-figure supplement 4.
(A)																(B)
Good performer								Naive								Good performer								Naive
Cell #	PSP amp (mV)	Late DVm (mV)	Lick DVm (mV)	Early DAP (Hz)	Late DAP (Hz)	Lick DAP (Hz)		Cell #	PSP amp (mV)	Late DVm (mV)	Lick DVm (mV)	Early DAP (Hz)	Late DAP (Hz)	Lick DAP (Hz)		Cell #	PSP amp (mV)	Late DVm (mV)	Lick DVm (mV)	Early DAP (Hz)	Late DAP (Hz)	Lick DAP (Hz)		Cell #	PSP amp (mV)	Late DVm (mV)	Lick DVm (mV)	Early DAP (Hz)	Late DAP (Hz)	Lick DAP (Hz)
1	9.62579	4.68114	1.43307	0	0	0		1	13.3755	3.92473	2.52914	-0.181818	-0.181818	-0.181818		1	14.373	2.51034	-2.17346	9.60584	0.21808	-0.162872		1	6.42042	-1.06521	1.60121	-0.0113636	-0.0113636	-0.0113636
2	15.0468	8.09657	3.93507	0.540541	0	0		2	7.99352	0.810468	5.14479	1.5687	4.0687	0.402035		2	6.72439	2.40301	0.4753	-0.131868	0.376607	-0.109269		2	8.4497	1.42597	1.31096	-0.0258621	-0.0258621	-0.0258621
3	12.3291	5.07019	1.07323	0.206143	-0.116438	-0.0519219		3	9.97988	1.31738	0.456099	-0.030303	-0.030303	-0.030303		3	6.94842	0.23211	-0.319037	-0.0572917	-0.0572917	-0.0572917		3	11.9292	0.337274	-1.78207	4.39272	-0.0517241	0.096424
4	20.6544	13.2698	11.2416	40.8358	11.7882	4.89934		4	8.51632	0.731448	-0.926235	-0.0744681	-0.0744681	-0.0744681		4	9.29886	1.49388	-0.770719	0	0	0		4	7.62276	2.72271	1.28713	-0.0125	-0.0125	-0.0125
5	8.15135	3.38396	3.7914	0.591543	0.199386	0.173242		5	6.63974	1.96491	-1.35838	-0.00961538	-0.00961538	-0.00961538		5	5.05883	1.65343	1.00013	-0.0869565	-0.0869565	-0.0869565		5	15.0937	10.3722	2.29358	10.4632	10.4632	0.110294
6	3.61854	-0.726224	-0.666879	0	0	0		6	7.40824	2.58524	-0.937996	-0.0294118	-0.0294118	-0.0294118		6	2.82771	0.19936	-0.633861	0	0	0		6	11.6938	4.74729	2.76728	-0.873418	-0.873418	0.459915
7	4.93347	2.73119	4.36135	-0.00649351	-0.00649351	0.183983		7	8.31835	1.29237	-1.46752	0.593814	-0.206186	-0.206186		7	8.37778	1.5112	1.42507	-0.0357143	-0.0357143	-0.0357143		7	16.9244	6.83955	5.55357	-0.0111111	-0.0111111	-0.0111111
8	8.56605	3.1236	2.03819	-0.1125	-0.1125	-0.1125		8	2.90903	0.797245	0.149354	-0.084507	-0.084507	-0.084507		8	8.7676	-3.11632	-1.09483	0	0	0		8	10.1798	5.2423	2.76939	0	0	0
9	9.68235	0.326447	-1.0136	2.55526	-0.301887	-0.149506		9	8.66989	2.96805	2.43072	0	0	0		9	7.42873	4.60127	3.61431	-0.0833333	-0.0833333	0.151961		9	15.9038	5.61451	5.69605	5.08916	-0.365385	0.725524
10	13.5472	8.70781	7.7287	1.55714	-0.0428571	0.0104762		10	7.54774	1.93459	1.23735	-0.00505051	-0.00505051	-0.00505051		10	10.6344	3.37785	2.39112	1.45377	0.771957	-0.182589		10	7.13871	-0.336316	1.83332	0.453125	-0.171875	0.675348
11	8.32443	3.92396	3.8672	-0.217742	0.0203532	0.956861		11	7.19462	2.04554	3.63066	-0.137931	0.0704023	3.52874		11	4.93086	0.866359	2.1677	-0.121212	0.295455	-0.121212		11	15.8478	-2.52373	1.83396	8.38889	-0.5	-0.0555556
12	14.8983	7.27732	6.4283	-0.222222	0.373016	0.0952383		12	8.21857	0.296405	-2.57339	2.19167	0.191667	-0.208333		12	15.7688	1.99006	1.87175	31.1	0.475	-0.15		12	19.2272	4.15318	1.14431	21.6651	0.301484	-0.153061
13	10.7501	1.72946	2.06525	-0.05	-0.05	-0.05		13	7.8842	0.82431	-2.49579	-0.220339	-0.220339	-0.220339		13	6.81717	3.00863	2.03591	1.28077	0.511538	-3.33462
14	4.37651	5.4455	2.56385	-1.02083	4.76864	0.97917		14	13.0561	1.39124	0.415282	4.00988	0.609877	-0.310123		14	8.41052	2.17505	1.53517	-0.0465116	-0.0465116	-0.0465116		Summary for M1-p
15	6.81894	0.848	-1.01313	-0.0769231	-0.0769231	-0.0769231										15	9.53198	0.820339	0.129755	-0.0208333	-0.0208333	-0.0208333		Mean	12.2026	3.12748	2.19239	4.1265	0.728457	0.149838
16	9.24462	4.08502	4.05202	-0.00675676	-0.00675676	0.352218		Summary for S2-p								16	7.27454	7.14296	2.1997	1.89655	6.58405	0.479885		SEM	1.24787	1.07646	0.573036	1.92877	0.889254	0.085884
17	12.189	4.94295	2.7605	0	0	0		Mean	8.40798	1.63457	0.445292	0.542187	0.292782	0.183615		17	11.8901	1.35939	0.724008	0	0	0		Median	11.8115	3.43795	1.83364	0.226563	-0.019181	-0.00555555
18	9.04069	8.91425	6.0024	0.333499	2.59765	1.31463		SEM	0.687004	0.26946	0.618849	0.328965	0.295633	0.26123		18	17.2347	1.87399	0.679602	16.3273	-0.4	-0.181818
19	8.86638	-0.920148	1.11618	0	0	0		Median	8.10604	1.35431	0.282318	-0.0195136	-0.0195136	-0.0523855		19	20.3456	3.35427	0.805534	24	0	0
20	7.27995	-1.09871	0.785557	0.187341	-0.98913	-0.793052										20	8.30828	1.0317	1.25228	0	0	0
21	9.00274	0.780022	0.1327	0.33629	-0.151515	-0.151515										21	13.6919	-0.256467	-0.216806	7.0035	-0.269231	-0.269231		Statistical P values
22	6.9481	2.465	1.50868	-0.047619	-0.047619	0.154401										22	9.00636	-1.20659	-1.14527	-0.0769231	-0.0769231	-0.0769231		Good performer vs Naive (PSP amp)			0.12	Two-tailed Wilcoxon rank sum test
23	10.1811	2.75378	1.70105	-0.328358	0.782752	-0.0320619		Statistical P values																Good performer vs Naive (Late DVm)			0.29	Two-tailed Wilcoxon rank sum test
24	20.1942	4.36952	2.14321	8.57143	0	0		Good performer vs Naive (PSP amp)			0.081	Two-tailed Wilcoxon rank sum test				Summary for M1-p								Good performer vs Naive (Lick DVm)			0.02	Two-tailed Wilcoxon rank sum test
25	17.3181	7.18192	7.12254	0.460262	-0.00485437	0.0261534		Good performer vs Naive (Late DVm)			0.0073	Two-tailed Wilcoxon rank sum test				Mean	9.71139	1.68299	0.725153	4.18214	0.370722	-0.19109		Good performer vs Naive (Early DAP)			0.49	Two-tailed Wilcoxon rank sum test
26	8.99934	3.21771	3.73241	-0.05	-0.05	-0.05		Good performer vs Naive (Lick DVm)			0.0031	Two-tailed Wilcoxon rank sum test				SEM	0.912336	0.438374	0.30011	1.84563	0.301318	0.152929		Good performer vs Naive (Late DAP)			0.19	Two-tailed Wilcoxon rank sum test
27	5.15806	3.21261	2.87678	-0.391304	0.719806	0.349437		Good performer vs Naive (Early DAP)			0.62	Two-tailed Wilcoxon rank sum test				Median	8.58906	1.58231	0.764771	0	0	-0.0519017		Good performer vs Naive (Lick DAP)			0.026	Two-tailed Wilcoxon rank sum test
28	17.7036	7.37002	5.32985	0.940186	0.2259	0.368757		Good performer vs Naive (Late DAP)			0.38	Two-tailed Wilcoxon rank sum test
29	13.7313	0.0646648	0.0905383	11.699	-1.24219	-1.0069		Good performer vs Naive (Lick DAP)			0.066	Two-tailed Wilcoxon rank sum test
30	15.7083	5.37162	6.64645	4.52222	4.38333	2.52222
31	5.24576	3.40779	2.39418	-1.30886	0.447895	-0.516068
Summary for Good performer
Mean	10.763	4.01997	3.12782	2.3602	0.75533	0.330392
SEM	0.826172	0.609065	0.520505	1.4157	0.447966	0.194428
Median	9.4352	3.65396	2.66217	0	0	0
