# Supplementary material for: Target-specific membrane potential dynamics of neocortical projection neurons during goal-directed behavior
Source: eLife. 2016 Jun 21;5:e15798. doi: 10.7554/eLife.15798 (PMC4915810; doi:10.7554/eLife.15798)
Supplement: Figure 2—source data 1. — DOI: http://dx.doi.org/10.7554/eLife.15798.012 [file elife-15798-fig2-data1.xlsx]

## Sheet: Figure 2
Figure 2-Source data. Data values and statistics underlying Figure 2.
(A) S2-p in Good performer mice									(B) M1-p in Good performer mice									(C) S2-p in Naive mice									(D) M1-p in Naive mice
	PSP amp (mV)		Late DVm (mV)		Lick DVm (mV)					PSP amp (mV)		Late DVm (mV)		Lick DVm (mV)					PSP amp (mV)		Late DVm (mV)		Lick DVm (mV)					PSP amp (mV)		Late DVm (mV)		Lick DVm (mV)
Cell #	Hit	Miss	Hit	Miss	Hit	Miss			Cell #	Hit	Miss	Hit	Miss	Hit	Miss			Cell #	Hit	Miss	Hit	Miss	Hit	Miss			Cell #	Hit	Miss	Hit	Miss	Hit	Miss
1	15.0468	7.22386	8.09657	5.15729	3.93507	0.70324			1	6.72439	6.03194	2.40301	0.367099	0.4753	-1.68402			1	13.38	8.85	3.92473	1.66294	5.14479	0.12			1	6.42042	5.64497	-1.06521	-1.23403	1.60121	0.518912
2	12.3291	8.66843	5.07019	4.62042	1.07323	1.2546			2	6.94842	7.22386	0.23211	1.50749	-0.319037	0.526854			2	7.99	12.34	0.810468	2.76089	0.456099	-1.312			2	8.4497	8.52784	1.42597	0.389933	1.31096	-0.0956948
3	3.61854	6.01841	-0.726224	-0.771307	-0.666879	-0.776965			3	9.29886	7.50051	1.49388	1.20626	-0.770719	-0.0331829			3	9.98	9.48	1.31738	2.4793	-0.926235	-0.088			3	11.9292	11.6367	0.337274	0.482861	-1.78207	0.210397
4	8.56605	8.58047	3.1236	3.18212	2.03819	1.74001			4	2.82771	2.92546	0.19936	0.927635	-0.633861	0.948779			4	8.52	9.5	0.731448	1.93231	-1.35838	0.528			4	7.62276	9.48654	2.72271	3.20304	1.28713	0.171866
5	14.8983	14.8514	7.27732	6.57553	6.4283	7.23128			5	8.37778	9.27311	1.5112	1.72874	1.42507	0.83024			5	6.64	7.25	1.96491	3.33952	-0.937996	1.432			5	15.0937	17.0117	10.3722	10.5264	2.29358	4.1876
6	10.7501	9.43364	1.72946	0.429014	2.06525	0.584591			6	10.6344	9.18627	3.37785	0.604201	2.39112	1.17491			6	7.41	1.8	2.58524	-1.44287	2.52914	-2.524			6	11.6938	8.60413	4.74729	3.10712	2.76728	-0.489004
7	6.81894	8.39574	0.848	2.3477	-1.01313	1.4204			7	6.81717	2.49438	3.00863	2.96177	2.03591	2.60163			7	8.32	9.64	1.29237	2.32714	-1.46752	-0.025			7	16.9244	13.9835	6.83955	3.59029	5.55357	-0.540113
8	9.24462	6.02818	4.08502	-0.988719	4.05202	-1.2434			8	7.27454	7.44559	7.14296	5.89247	2.1997	1.9187			8	2.91	3.52	0.797245	-0.419998	0.149354	-0.282			8	10.1798	8.75497	5.2423	2.36233	2.76939	0.199993
9	12.189	10.7695	4.94295	3.46697	2.7605	0.292934			9	20.3456	14.9385	3.35427	-0.396717	0.805534	-0.559704			9	8.67	8.12	2.96805	1.88129	2.43072	0.098			9	15.9038	14.9847	5.61451	5.36701	5.69605	0.311785
10	9.00274	6.17949	0.780022	-1.38034	0.1327	-1.67494			10	9.00636	8.95765	-1.20659	0.0659001	-1.14527	0.115761			10	7.55	7.67	1.93459	1.29309	1.23735	-0.196			10	7.13871	7.08955	-0.336316	-1.02708	1.83332	-0.150597
11	6.9481	4.07217	2.465	0.192063	1.46452	-1.96591												11	7.19	8.12	2.04554	2.37622	3.63066	0.226			11	15.8478	15.1421	-2.52373	-2.69488	1.83396	-1.05171
12	10.1811	6.14298	2.75378	2.22256	1.66141	-0.887147			Summary for B									12	8.22	13.1	0.296405	4.46386	-2.57339	0.841			12	19.2272	20.5156	4.15318	5.9186	1.14431	0.305049
13	20.1942	21.0612	4.36952	4.79233	1.98219	0.0354618			Mean	8.82552	7.59773	2.15167	1.48648	0.646375	0.583997			13	7.88	8.04	0.82431	1.24878	-2.49579	0.258
14	17.3181	16.2512	7.18192	4.61367	7.02013	1.65952			SEM	1.44065	1.11338	0.732403	0.573828	0.419496	0.386588			14	13.06	15.31	1.39124	1.19186	0.415282	1.314			Summary for D
15	5.15806	5.71381	3.21261	4.29952	2.86166	2.70908			Median	7.82616	7.47305	1.95711	1.06695	0.640417	0.678547												Mean	12.2026	11.7819	3.12748	2.4993	2.19239	0.298207
16	17.7036	17.8744	7.37002	9.37588	5.1416	1.50877												Summary for C									SEM	1.24787	1.30513	1.07646	1.05992	0.573036	0.376497
17	13.7313	10.1283	0.0646648	-0.0746095	0.0633785	-0.207601												Mean	8.40857	8.76714	1.63457	1.79245	0.445292	0.0278571			Median	11.8115	10.5616	3.43795	2.73473	1.83364	0.185929
18	15.7083	5.96624	5.37162	0.153554	6.54249	-0.227329			Statistical P values (for B)									SEM	0.687328	0.9291	0.26946	0.391379	0.618849	0.268413
19	5.24576	5.96008	3.40779	3.25222	2.49153	1.29608			Hit vs Miss (PSP amp)			0.2324	Two-tailed Wilcoxon signed-rank test					Median	8.105	8.485	1.35431	1.9068	0.282318	0.109
									Hit vs Miss (Late DVm)			0.43	Two-tailed Wilcoxon signed-rank test
Summary for A									Hit vs Miss (Lick DVm)			> 0.99	Two-tailed Wilcoxon signed-rank test					Statistical P values (for C)									Statistical P values (for D)
Mean	11.2975	9.43787	3.75915	2.70873	2.63338	0.708036												Hit vs Miss (PSP amp)			0.24	Two-tailed Wilcoxon signed-rank test					Hit vs Miss (PSP amp)			0.42	Two-tailed Wilcoxon signed-rank test
SEM	1.08342	1.08575	0.594548	0.660772	0.545866	0.465349												Hit vs Miss (Late DVm)			0.67	Two-tailed Wilcoxon signed-rank test					Hit vs Miss (Late DVm)			0.13	Two-tailed Wilcoxon signed-rank test
Median	10.7501	8.39574	3.40779	3.18212	2.06525	0.584591												Hit vs Miss (Lick DVm)			0.71	Two-tailed Wilcoxon signed-rank test					Hit vs Miss (Lick DVm)			0.034	Two-tailed Wilcoxon signed-rank test
Statistical P values (for A)
Hit vs Miss (PSP amp)			0.026	Two-tailed Wilcoxon signed-rank test
Hit vs Miss (Late DVm)			0.029	Two-tailed Wilcoxon signed-rank test
Hit vs Miss (Lick DVm)			0.0014	Two-tailed Wilcoxon signed-rank test
