# Supplementary material for: Target-specific membrane potential dynamics of neocortical projection neurons during goal-directed behavior
Source: eLife. 2016 Jun 21;5:e15798. doi: 10.7554/eLife.15798 (PMC4915810; doi:10.7554/eLife.15798)
Supplement: Figure 2—source data 2. — DOI: http://dx.doi.org/10.7554/eLife.15798.013 [file elife-15798-fig2-data2.xlsx]

## Sheet: Figure2-figure supplement 2
Figure 2-source data 2. Data values and statistics underlying Figure 2-figure supplement 2.
(A) S2-p in Good performer mice									(B) M1-p in Good performer mice									(C) S2-p in Naive mice									(D) M1-p in Naive mice
	PSP amp (mV)		Late DVm (mV)		Lick DVm (mV)					PSP amp (mV)		Late DVm (mV)		Lick DVm (mV)					PSP amp (mV)		Late DVm (mV)		Lick DVm (mV)					PSP amp (mV)		Late DVm (mV)		Lick DVm (mV)
Mouse #	Hit	Miss	Hit	Miss	Hit	Miss			Mouse #	Hit	Miss	Hit	Miss	Hit	Miss			Mouse #	Hit	Miss	Hit	Miss	Hit	Miss			Mouse #	Hit	Miss	Hit	Miss	Hit	Miss
1	12.4411	10.4254	3.1961	2.40232	1.70271	-0.939198			1	7.65722	6.91877	1.37633	1.02695	-0.204819	-0.396783			1	7.02399	4.52386	2.27508	0.948325	0.795572	-0.54589			1	6.42042	5.64497	-1.06521	-1.23403	1.60121	0.518912
2	14.7198	8.04727	2.71814	0.0394723	3.30293	-0.217465			2	2.82771	2.92546	0.19936	0.927635	-0.633861	0.948779			2	10.6845	10.5912	2.3676	2.21191	2.80044	-0.596201			2	8.4497	8.52784	1.42597	0.389933	1.31096	-0.0956948
3	11.2381	10.9825	5.19726	4.4566	4.9409	2.1843			3	8.37778	9.27311	1.5112	1.72874	1.42507	0.83024			3	9.2481	9.48894	1.02441	2.2058	-1.14231	0.220447			3	9.77598	10.5616	1.52999	1.84295	-0.24747	0.191132
4	17.7036	17.8744	7.37002	9.37588	5.1416	1.50877			4	10.6344	9.18627	3.37785	0.604201	2.39112	1.17491			4	8.31835	9.63733	1.29237	2.32714	-1.46752	-0.0246811			4	13.4729	12.0886	6.80033	4.89654	3.34596	0.839619
5	5.24576	5.96008	3.40779	3.25222	2.49153	1.29608			5	6.81717	2.49438	3.00863	2.96177	2.03591	2.60163			5	2.90903	3.51892	0.797245	-0.419998	0.149354	-0.282106			5	12.9634	12.4055	0.918155	0.54835	3.12111	-0.296841
6	15.0468	7.22386	8.09657	5.15729	3.93507	0.70324			6	7.27454	7.44559	7.14296	5.89247	2.1997	1.9187			6	8.10881	7.89812	2.45132	1.58719	1.83404	-0.0489457			6	19.2272	20.5156	4.15318	5.9186	1.14431	0.305049
7	12.3291	8.66843	5.07019	4.62042	1.07323	1.2546			7	14.676	11.9481	1.07384	-0.165408	-0.169868	-0.221971			7	7.7066	10.6093	1.17097	3.42004	0.528635	0.533356
8	3.61854	6.01841	-0.726224	-0.771307	-0.666879	-0.776965												8	7.8842	8.03502	0.82431	1.24878	-2.49579	0.25757			Summary for B
9	8.56605	8.58047	3.1236	3.18212	2.03819	1.74001			Summary for B									9	13.0561	15.3099	1.39124	1.19186	0.415282	1.31377			Mean	11.7183	11.624	2.29374	2.06039	1.71268	0.243696
10	12.8242	12.1425	4.50339	3.50227	4.24677	3.90794			Mean	8.32354	7.17024	2.52717	1.85377	1.00618	0.979358												SEM	1.85775	2.05224	1.12957	1.13881	0.547427	0.167806
11	6.81894	8.39574	0.848	2.3477	-1.01313	1.4204			SEM	1.37766	1.30325	0.874894	0.767405	0.490813	0.405689			Summary for C									Median	11.3697	11.3251	1.47798	1.19565	1.45608	0.24809
12	9.24462	6.02818	4.08502	-0.988719	4.05202	-1.2434			Median	7.65722	7.44559	1.5112	1.02695	1.42507	0.948779			Mean	8.32663	8.84584	1.51051	1.63567	0.157523	0.0919244
13	12.189	10.7695	4.94295	3.46697	2.7605	0.292934												SEM	0.9163	1.16423	0.223523	0.360679	0.549968	0.196687			Statistical P values (for D)
14	9.00274	6.17949	0.780022	-1.38034	0.1327	-1.67494			Statistical P values (for B)									Median	8.10881	9.48894	1.29237	1.58719	0.415282	-0.0246811			Hit vs Miss (PSP amp)			>0.99	Two-tailed Wilcoxon signed-rank test
									Hit vs Miss (PSP amp)			0.3	Two-tailed Wilcoxon signed-rank test														Hit vs Miss (Late DVm)			0.56	Two-tailed Wilcoxon signed-rank test
Summary for A									Hit vs Miss (Late DVm)			0.22	Two-tailed Wilcoxon signed-rank test					Statistical P values (for C)									Hit vs Miss (Lick DVm)			0.063	Two-tailed Wilcoxon signed-rank test
Mean	10.7849	9.09259	3.75806	2.76164	2.43844	0.67545			Hit vs Miss (Lick DVm)			0.69	Two-tailed Wilcoxon signed-rank test					Hit vs Miss (PSP amp)			0.25	Two-tailed Wilcoxon signed-rank test
SEM	1.05147	0.868354	0.650852	0.772794	0.534394	0.410683												Hit vs Miss (Late DVm)			>0.99	Two-tailed Wilcoxon signed-rank test
Median	11.7135	8.48811	3.74641	3.21717	2.62601	0.97892												Hit vs Miss (Lick DVm)			>0.99	Two-tailed Wilcoxon signed-rank test
Statistical P values (for A)
Hit vs Miss (PSP amp)			0.078	Two-tailed Wilcoxon signed-rank test
Hit vs Miss (Late DVm)			0.049	Two-tailed Wilcoxon signed-rank test
Hit vs Miss (Lick DVm)			0.004	Two-tailed Wilcoxon signed-rank test
