# Supplementary material for: Target-specific membrane potential dynamics of neocortical projection neurons during goal-directed behavior
Source: eLife. 2016 Jun 21;5:e15798. doi: 10.7554/eLife.15798 (PMC4915810; doi:10.7554/eLife.15798)
Supplement: Figure 3—source data 1. — DOI: http://dx.doi.org/10.7554/eLife.15798.017 [file elife-15798-fig3-data1.xlsx]

## Sheet: Figure 3
Figure 3-source data 1. Data values and statistics underlying Figure 3.
(A)									(B)
M1-p neurons				S2-p neurons					M1-p neurons				S2-p neurons
Cell #	DVm (mV)	DAP (Hz)		Cell #	DVm (mV)	DAP (Hz)			Cell #	DVm (mV)	DAP (Hz)		Cell #	DVm (mV)	DAP (Hz)
1	0.556142	0.0793651		1	3.10281	-0.0198413			1	0.862317	0.25		1	-0.227735	-0.597826
2	1.0258	-0.0609756		2	4.28116	0			2	1.49685	0		2	2.83036	0
3	-1.58573	-0.0263158		3	0.692961	0.0240385			3	-1.8671	0		3	-0.0100455	-0.0225225
4	0.678631	-0.0581395		4	9.85135	12.3558			4	2.34812	0		4	0.658997	0
5	3.00304	0.0206612		5	1.30513	0.284091			5	3.52158	0.0704225		5	-0.240699	-0.03125
6	0.667933	-0.142857		6	4.20916	0.120482			6	1.28397	-0.181818		6	-0.471812	0
7	0.553741	-0.0688073		7	2.57196	0.15625			7	2.30239	-0.125		7	-1.02353	-0.0485437
8	2.38015	0		8	8.26394	0			8	1.78856	0		8	-0.603302	-0.12931
9	-0.866271	0		9	2.63674	0.11194			9	3.10905	-0.0342466		9	2.15466	0
10	1.89583	0.125		10	3.12365	3.24074			10	2.00223	0.235294		10	1.81179	0
				11	-0.430337	0			11	0.758923	0		11	5.3345	3.23232
Summary for M1-p				12	4.30145	0			12	0.670279	-0.104167		12	0.196433	0
Mean	0.830927	-0.0132069		13	4.42872	1.19048							13	-1.08497	-0.315534
SEM	0.437327	0.0243903		14	-1.1731	-0.0892857			Summary for M1-p				14	0.524652	-0.130597
Median	0.673282	-0.0131579		15	5.46402	0.0581395			Mean	1.5231	0.0092071
				16	3.15507	0			SEM	0.402609	0.0371842		Summary for S2-p
				17	6.18461	0.787671			Median	1.6427	0		Mean	0.703521	0.139767
				18	1.73357	1.06164							SEM	0.475401	0.242117
				19	5.43537	2.54902							Median	0.0931938	-0.0112613
				20	0.457741	-0.833333
									Statistical P values
				Summary for S2-p					M1-p vs S2-p (DVm)			0.0596	Two-tailed Wilcoxon rank sum test
				Mean	3.4798	1.04989			M1-p vs S2-p (DAP)			0.3032	Two-tailed Wilcoxon rank sum test
				SEM	0.617375	0.631671
				Median	3.13936	0.0850399
Statistical P values
M1-p vs S2-p (DVm)			0.0045	Two-tailed Wilcoxon rank sum test
M1-p vs S2-p (DAP)			0.0266	Two-tailed Wilcoxon rank sum test
