# Supplementary material for: Target-specific membrane potential dynamics of neocortical projection neurons during goal-directed behavior
Source: eLife. 2016 Jun 21;5:e15798. doi: 10.7554/eLife.15798 (PMC4915810; doi:10.7554/eLife.15798)
Supplement: Figure 3—source data 2. — DOI: http://dx.doi.org/10.7554/eLife.15798.018 [file elife-15798-fig3-data2.xlsx]

## Sheet: Figure 3-figure supplement 3
Figure 3-Source data. Data values and statistics underlying Figure 3-figure supplement 3.
(A) S2-p neurons									(B) M1-p neurons									(C) Good performer mice									(D) Naive
Good performer				Naive					Good performer				Naive					M1-p neurons				S2-p neurons					M1-p neurons				S2-p neurons
Cell #	DVm (mV)	DAP (Hz)		Cell #	DVm (mV)	DAP (Hz)			Cell #	DVm (mV)	DAP (Hz)		Cell #	DVm (mV)	DAP (Hz)			Mouse #	DVm (mV)	DAP (Hz)		Mouse #	DVm (mV)	DAP (Hz)			Mouse #	DVm (mV)	DAP (Hz)		Mouse #	DVm (mV)	DAP (Hz)
1	3.10281	-0.0198413		1	-0.227735	-0.597826			1	0.556142	0.0793651		1	0.862317	0.25			1	0.556142	0.0793651		1	3.69198	-0.00992063			1	0.862317	0.25		1	1.30131	-0.298913
2	4.28116	0		2	2.83036	0			2	1.0258	-0.0609756		2	1.49685	0			2	-0.279965	-0.0436457		2	0.692961	0.0240385			2	1.49685	0		2	0.324476	-0.0112613
3	0.692961	0.0240385		3	-0.0100455	-0.0225225			3	-1.58573	-0.0263158		3	-1.8671	0			3	0.678631	-0.0581395		3	5.57824	6.31993			3	0.24051	0		3	-0.356256	-0.015625
4	9.85135	12.3558		4	0.658997	0			4	0.678631	-0.0581395		4	2.34812	0			4	3.00304	0.0206612		4	4.20916	0.120482			4	2.22412	-0.0590989		4	-1.02353	-0.0485437
5	1.30513	0.284091		5	-0.240699	-0.03125			5	3.00304	0.0206612		5	3.52158	0.0704225			5	0.667933	-0.142857		5	5.41795	0.078125			5	2.55564	0.100524		5	-0.603302	-0.12931
6	4.20916	0.120482		6	-0.471812	0			6	0.667933	-0.142857		6	1.28397	-0.181818			6	1.46695	-0.0344037		6	2.63674	0.11194			6	0.758923	0		6	1.98323	0
7	2.57196	0.15625		7	-1.02353	-0.0485437			7	0.553741	-0.0688073		7	2.30239	-0.125			7	0.514779	0.0625		7	3.12365	3.24074			7	0.670279	-0.104167		7	2.76547	1.61616
8	8.26394	0		8	-0.603302	-0.12931			8	2.38015	0		8	1.78856	0							8	-0.430337	0							8	-1.08497	-0.315534
9	2.63674	0.11194		9	2.15466	0			9	-0.866271	0		9	3.10905	-0.0342466			Summary for M1-p				9	4.30145	0			Summary for M1-p				9	0.524652	-0.130597
10	3.12365	3.24074		10	1.81179	0			10	1.89583	0.125		10	2.00223	0.235294			Mean	0.943929	-0.0166457		10	4.42872	1.19048			Mean	1.25838	0.0267512
11	-0.430337	0		11	5.3345	3.23232							11	0.758923	0			SEM	0.393171	0.0291014		11	-1.1731	-0.0892857			SEM	0.325893	0.0441693		Summary for S2-p
12	4.30145	0		12	0.196433	0			Summary for Good performer				12	0.670279	-0.104167			Median	0.667933	-0.0344037		12	4.30954	0.0290698			Median	0.862317	0		Mean	0.425675	0.0740419
13	4.42872	1.19048		13	-1.08497	-0.315534			Mean	0.830927	-0.0132069											13	6.18461	0.787671							SEM	0.45246	0.196782
14	-1.1731	-0.0892857		14	0.524652	-0.130597			SEM	0.437327	0.0243903		Summary for Naive									14	3.58447	1.80533							Median	0.324476	-0.0485437
15	5.46402	0.0581395							Median	0.673282	-0.0131579		Mean	1.5231	0.0092071							15	0.457741	-0.833333
16	3.15507	0		Summary for Naive									SEM	0.402609	0.0371842
17	6.18461	0.787671		Mean	0.703521	0.139767							Median	1.6427	0							Summary for S2-p					Statistical P values
18	1.73357	1.06164		SEM	0.475401	0.242117																Mean	3.13425	0.851684			M1-p vs S2-p (DVm)			0.17	Two-tailed Wilcoxon rank sum test
19	5.43537	2.54902		Median	0.0931938	-0.0112613																SEM	0.582328	0.465973			M1-p vs S2-p (DAP)			0.12	Two-tailed Wilcoxon rank sum test
20	0.457741	-0.833333							Statistical P values													Median	3.69198	0.078125
									Good performer vs Naive (DVm)			0.16	Two-tailed Wilcoxon rank sum test
Summary for Good performer									Good performer vs Naive (DAP)			0.78	Two-tailed Wilcoxon rank sum test
Mean	3.4798	1.04989																Statistical P values
SEM	0.617375	0.631671																M1-p vs S2-p (DVm)			0.039	Two-tailed Wilcoxon rank sum test
Median	3.13936	0.0850399																M1-p vs S2-p (DAP)			0.075	Two-tailed Wilcoxon rank sum test
Statistical P values
Good performer vs Naive (DVm)			0.0017	Two-tailed Wilcoxon rank sum test
Good performer vs Naive (DAP)			0.0042	Two-tailed Wilcoxon rank sum test
